# Supplementary material for: Overexpression of TGR5 alleviates myocardial ischemia/reperfusion injury via AKT/GSK-3β mediated inflammation and mitochondrial pathway
Source: Oxford University Press journal article supplement (doi:10.1042/bsr20193482), 2020-01-01
Supplement: bsr-2019-3482_supp.pdf [file bsr-2019-3482_supp.pdf]

**A**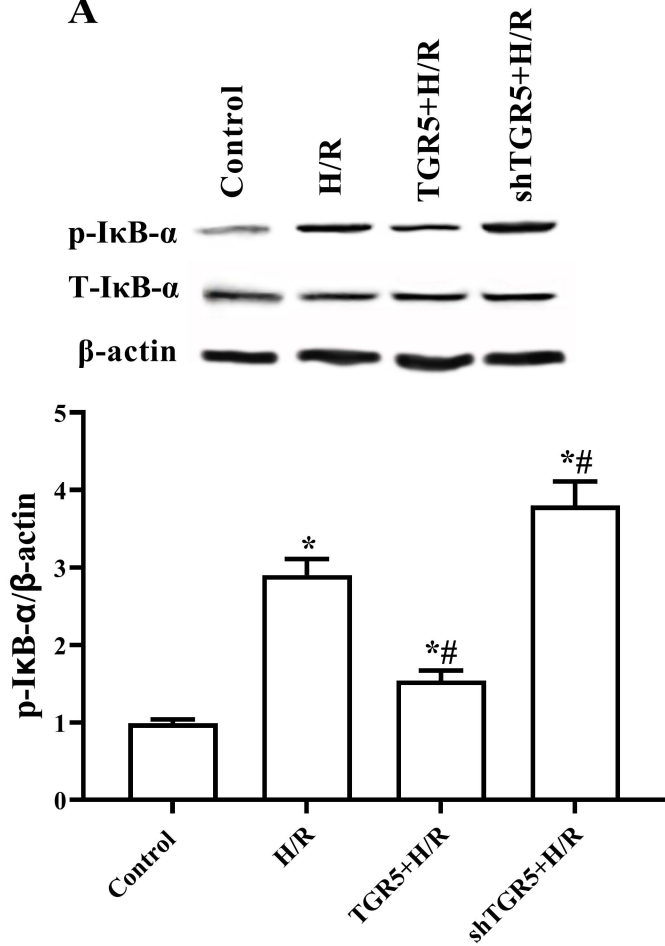**B**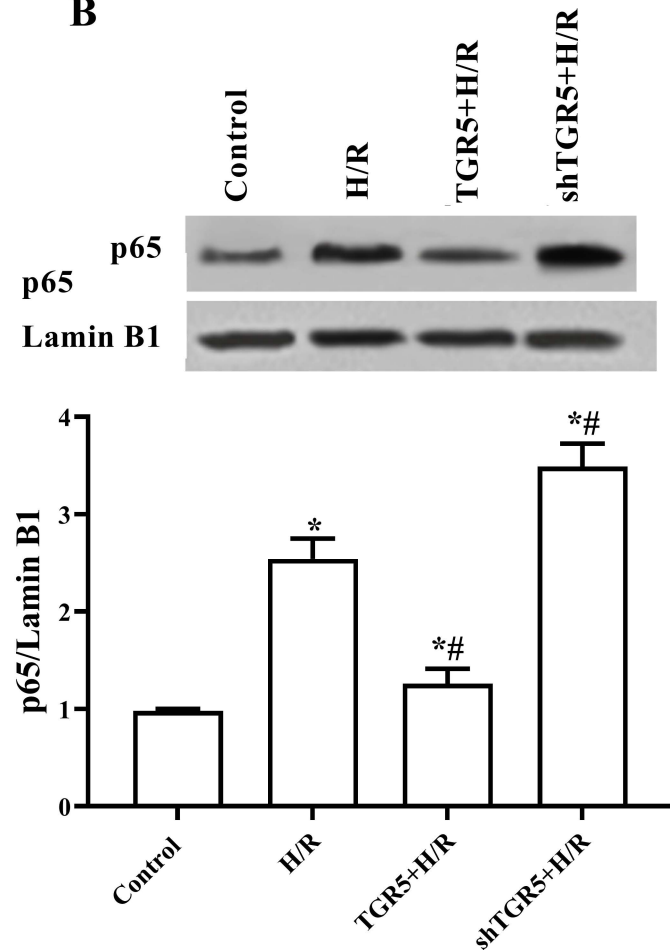

Figure S1 overexpression of TGR5 suppressed phosphorylation of I $\kappa$ B- $\alpha$  (A) and p65 translocation (B). H9C2 cells were exposed in hypoxia condition for 4h followed by 6h of reoxygenation then transfected pcDNA3.1-TRG5 or Lentivirus-mediated TRG5-shRNAs. H/R: Hypoxia for 4h and reoxygenation for 6h; \* $P < 0.05$ , compared with control group; # $P < 0.05$ , compared with H/R group.
